# Supplementary material for: Study on the Canine Adenovirus Type 1 (CAdV-1) Infection in Domestic Dogs in Southern Italy
Source: MDPI journal article supplement (doi:10.3390/pathogens11111254), 2022-10-28
Supplement: s1 [file s1]

**Supplementary Material Table S2.** Number of positive dogs and frequency of detection.

|               | Single infection |      |        | Mixed infection |                 |                |                         | Total |
|---------------|------------------|------|--------|-----------------|-----------------|----------------|-------------------------|-------|
|               | CPV-2            | CCoV | CAdV-1 | CPV-2<br>CCoV   | CPV-2<br>CAdV-1 | CAdV-1<br>CCoV | CPV-2<br>CAdV-1<br>CCoV |       |
| Positive      | 161              | 4    | 1      | 20              | 3               | 1              | 1                       | 191   |
| Frequency (%) | 84.3             | 2.1  | 0.5    | 10.5            | 1.6             | 0.5            | 0.5                     |       |
