# Supplementary material for: Study on the Canine Adenovirus Type 1 (CAdV-1) Infection in Domestic Dogs in Southern Italy
Source: MDPI journal article supplement (doi:10.3390/pathogens11111254), 2022-10-28
Supplement: s1 [file s1]

**Supplementary Material Table S1.** Primers, probe, and expected amplicons size for the viral detection, typing, and sequencing.

| Virus                        | Target                                        | Primer                        | Primer sequence (5'-3')               | Amplicon size (bp) | Reference |
|------------------------------|-----------------------------------------------|-------------------------------|---------------------------------------|--------------------|-----------|
| CAcV                         | Early region 3 (E3) gene and flanking regions | <sup>1</sup> HA1              | CGCGCTGAACATTACTACCTTGTC              | 508 (CAcV-1)       | [31]      |
|                              |                                               | <sup>1</sup> HA2              | CCTAGAGCACTTCGTGTCCGCTT               | 1030 (CAcV-2)      |           |
|                              | Penton gene                                   | <sup>2</sup> CAcV2-penFF      | AATGGAGTTTTTCGTCGTCTCCT               | 1491 (CAcV-1)      | [39]      |
|                              |                                               | <sup>2</sup> CAcV2-penRR      | TTAGTCGGTGATATTAAGATGGC               |                    |           |
|                              | Hexon gene                                    | <sup>2</sup> CAcV-Hexon-For1  | GAAGTTTGCCGACCCTGTC                   | 2813               | [28]      |
|                              |                                               | <sup>2</sup> CAcV-Hexon-Rev1  | ACTATGGCTCGCAGCTCTTC                  |                    |           |
|                              |                                               | <sup>4</sup> CAcV-Hexon-For2  | CTGATGCCTWTAAATACACACCTGA             |                    |           |
|                              |                                               | <sup>4</sup> CAcV-Hexon-Rev2  | GACCTGAATATGGAACGAGCA                 |                    |           |
|                              | Fiber gene                                    | <sup>2</sup> CAcV-Fiber-For1  | ATGTGGTCTCTCCCRACAGC                  | 1787 (CAcV-1)      | [28]      |
|                              |                                               | <sup>2</sup> CAcV-Fiber-Rev1  | ACTTTTCTGAAGCGGYAG                    | 1748 (CAcV-2)      |           |
| <sup>4</sup> CAcV-Fiber-For2 |                                               | ACCATATAACTCTAAGTGCTGGGAG     |                                       |                    |           |
| <sup>4</sup> CAcV-Fiber-Rev3 |                                               | TATGGGAAAGTCCAGGTCCA          |                                       |                    |           |
| CPV-2                        | VP2 gene                                      | <sup>1</sup> VP2-850-Forward  | GAGCATTGGGCTTACCA                     | 700                | [32]      |
|                              |                                               | <sup>1</sup> VP2-1550-Reverse | GCAAGATGCATCAGGATC                    |                    |           |
|                              |                                               | <sup>2,3</sup> p1             | ATGAGTGATGGAGCAGTTC                   | 1745               | [36]      |
|                              |                                               | <sup>2,3</sup> vPR            | TTTCTAGGGTGCTAGTTGAG                  |                    |           |
|                              |                                               | <sup>4</sup> 41-FOX2          | GCCCTTGTTAGACGC                       |                    |           |
| CDV                          | P gene                                        | <sup>1</sup> DMV 1            | ATGTTTATGATCACAGCGGT                  | 429                | [33]      |
|                              |                                               | <sup>1</sup> DMV 2            | ATTGGGTTGCACCACTTGTC                  |                    |           |
| CCoV                         | M gene                                        | <sup>1</sup> CCV1             | TCCAGATATGTAATGTTCCGG                 | 409                | [34]      |
|                              |                                               | <sup>1</sup> CCV2             | TCTGTTGAGTAATCACCAGCT                 |                    |           |
|                              | M gene (CCoV-I)                               | <sup>2</sup> CCoV1a           | GTGCTTCCTCTTGAAGGTACA                 | 239                | [37]      |
|                              |                                               | <sup>2</sup> CCoV2            | TCTGTTGAGTAATCACCAGCT                 |                    |           |
|                              | M gene (CCoV-II)                              | <sup>2</sup> Can1F            | TAACATTGCTCTCAGGGAATTTG               | 202                | [37]      |
|                              |                                               | <sup>2</sup> CCoV2            | TCTGTTGAGTAATCACCAGCT                 |                    |           |
|                              | S gene (CCoV-I)                               | <sup>2</sup> EL1F             | CAAGTTGACCGTCTTATTACTGGTAG            | 346                | [37]      |
|                              |                                               | <sup>2</sup> EL1R             | TCATATACGTACCATTATAGCTGAAGA           |                    |           |
|                              | S gene (CCoV-IIa)                             | <sup>2</sup> S5               | TGCATTTGTGTCTCAGACTT                  | 694                | [37]      |
| <sup>2</sup> S6              |                                               | CCAAGGCCATTTTACATAAG          |                                       |                    |           |
| RoV                          | NSP3 region                                   | <sup>2</sup> CEPol-1          | TCTACAATTATGGCTCTATCAC                | 370                | [38]      |
|                              |                                               | <sup>2</sup> TGSP-2           | TAATCACCTAAMACCACATCTG                |                    |           |
|                              |                                               |                               |                                       |                    |           |
| RoV                          | NSP3 region                                   | <sup>1</sup> NVP3-FDeg        | ACCATCTWCACRTRACCCTC                  | 87                 | [35]      |
|                              |                                               | <sup>1</sup> NVP3-R1          | GGTCACATAACGCCCTATA                   |                    |           |
|                              |                                               | <sup>5</sup> NVP3-Probe       | ATGAGCACAATAGTTAAAAGCTAACA<br>CTGTCAA |                    |           |

Primers used for <sup>1</sup>detection, <sup>2</sup>typing, and <sup>3</sup>sequencing of CAcV (canine adenovirus), CPV-2 (canine parvovirus type 2), CDV (canine distemper virus), CCoV (canine coronavirus), and RoV (rotavirus); <sup>4</sup>additional internal primers used for sequencing. <sup>5</sup>probe labeled with reporting dye (6-FAM) and with quenching dye (MGB).
